# Supplementary material
Source: PubMed Central journal article supplement (PMC4703439)

**Figure S1.**

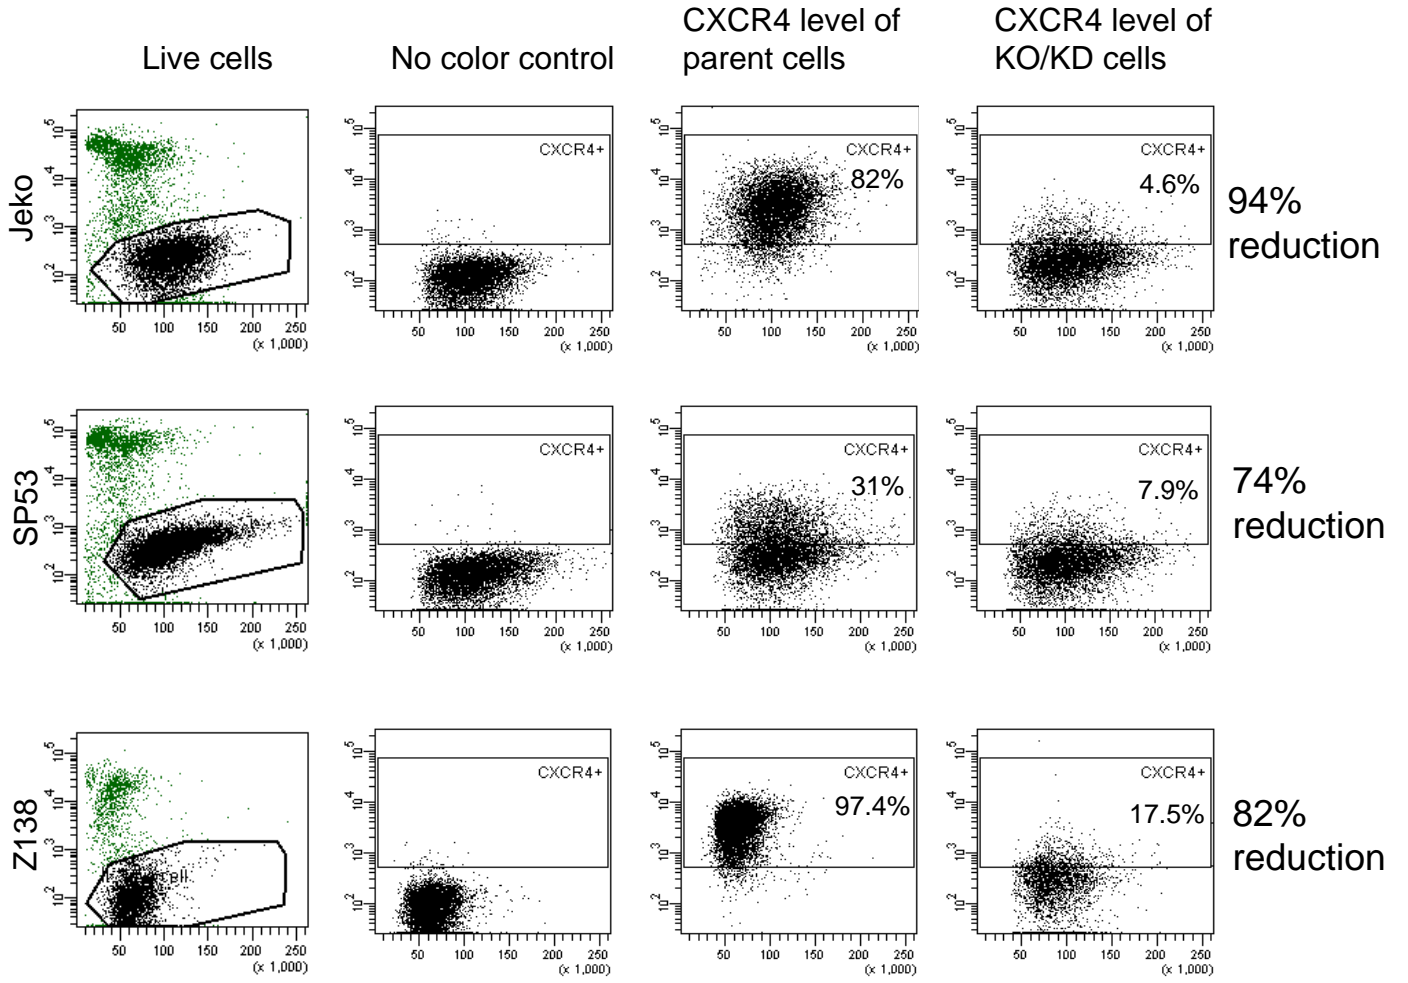

Figure S2.

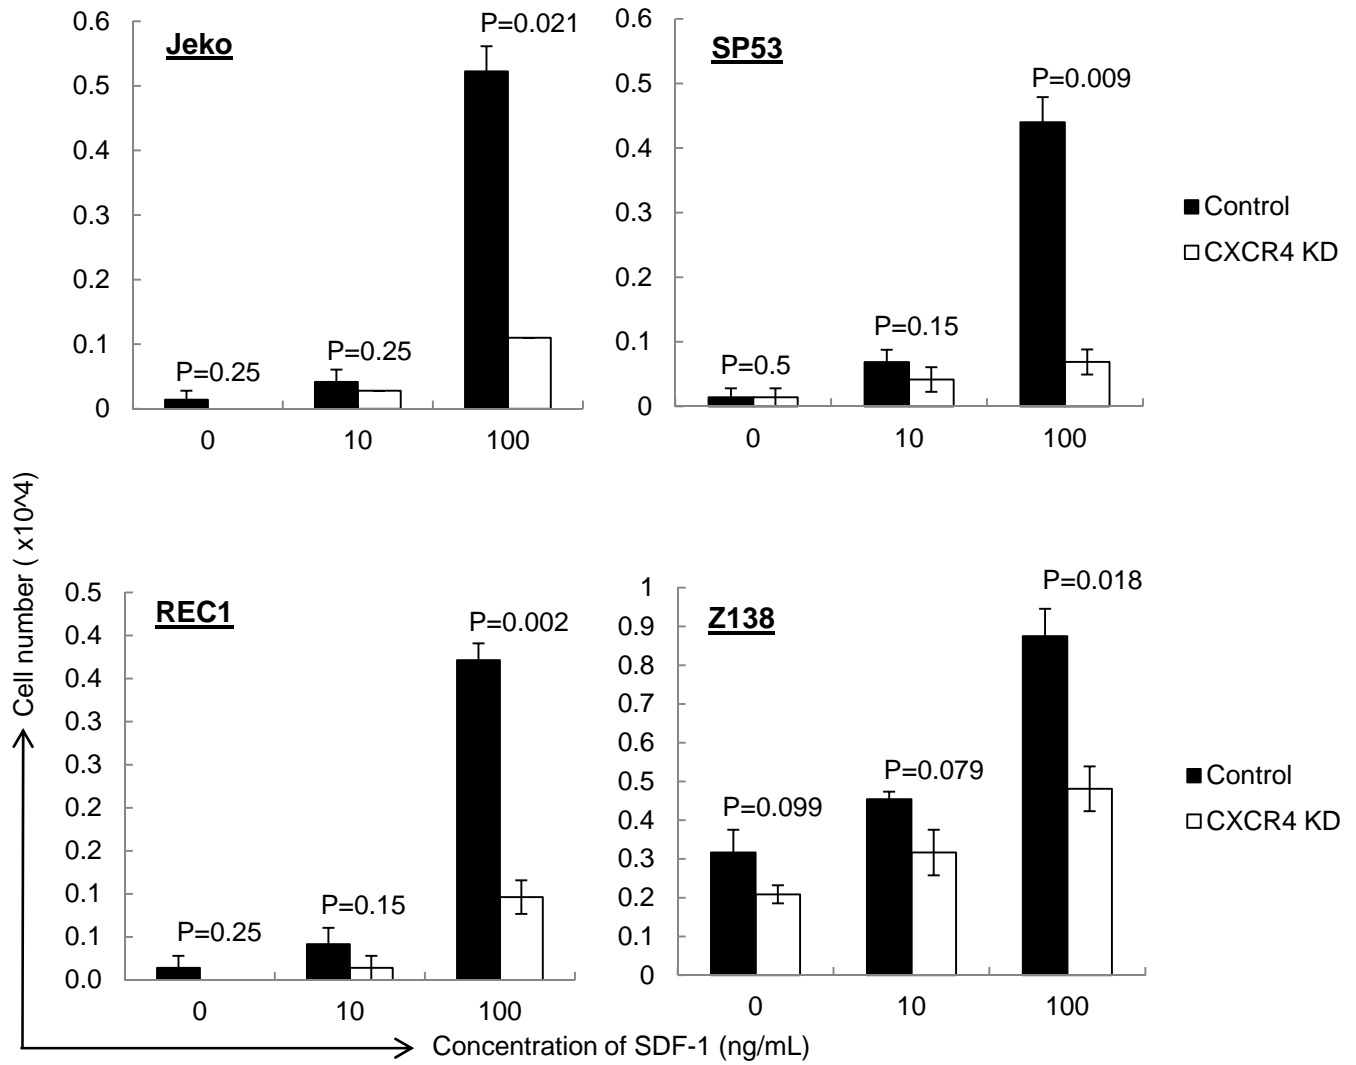

Figure S3.

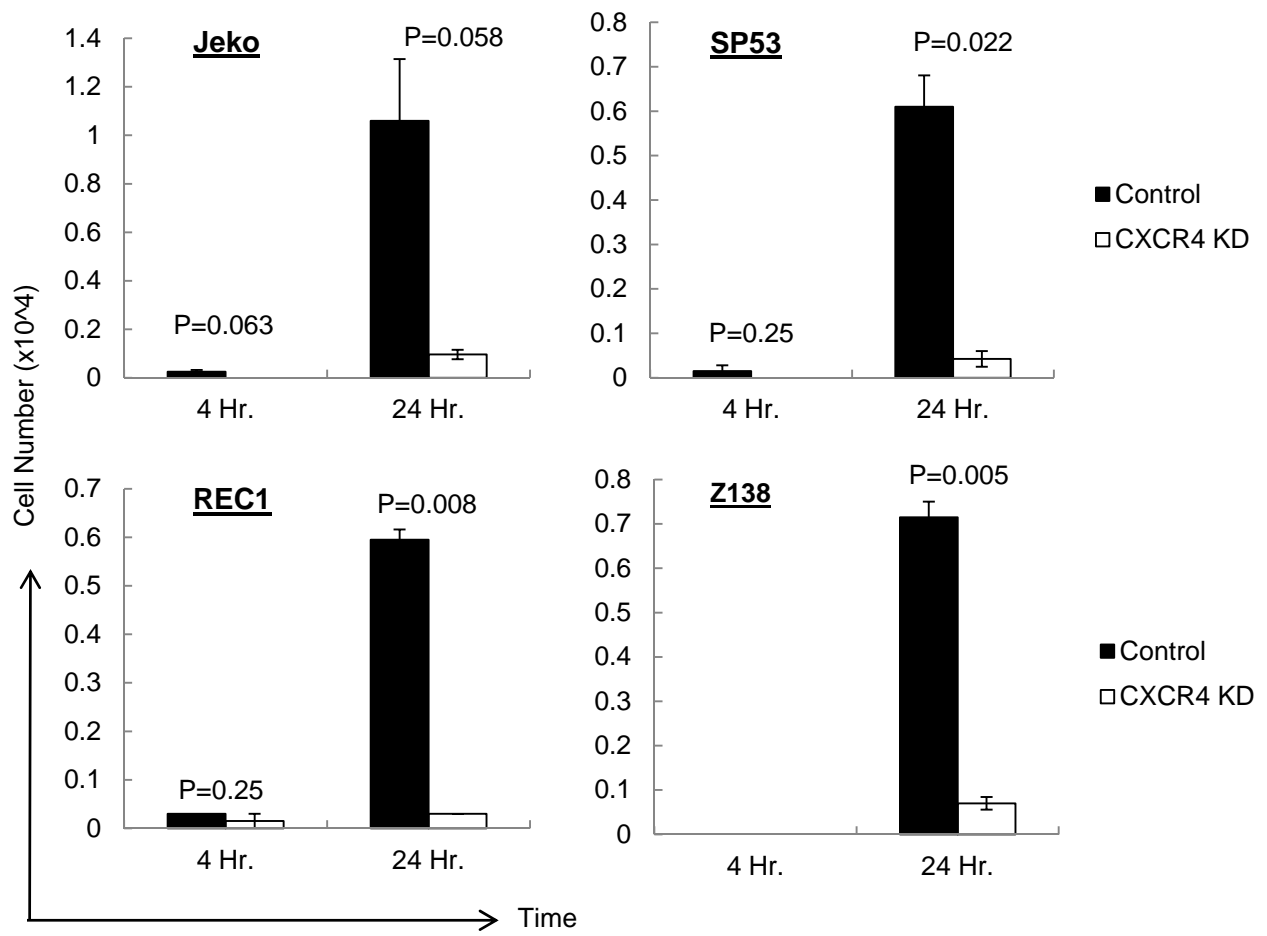

Figure S4.

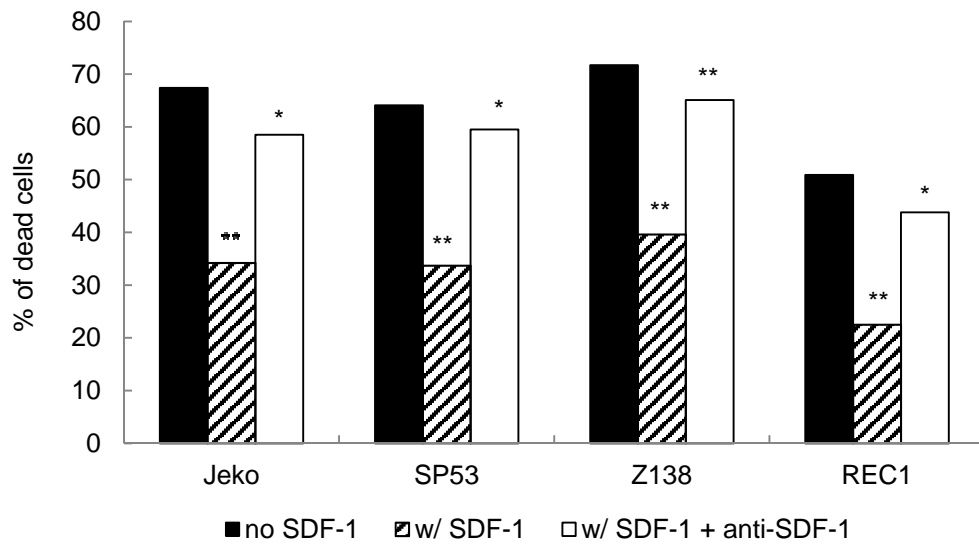

\*\* :  $p \leq 0.05$

\* :  $p > 0.05$

Figure S5.

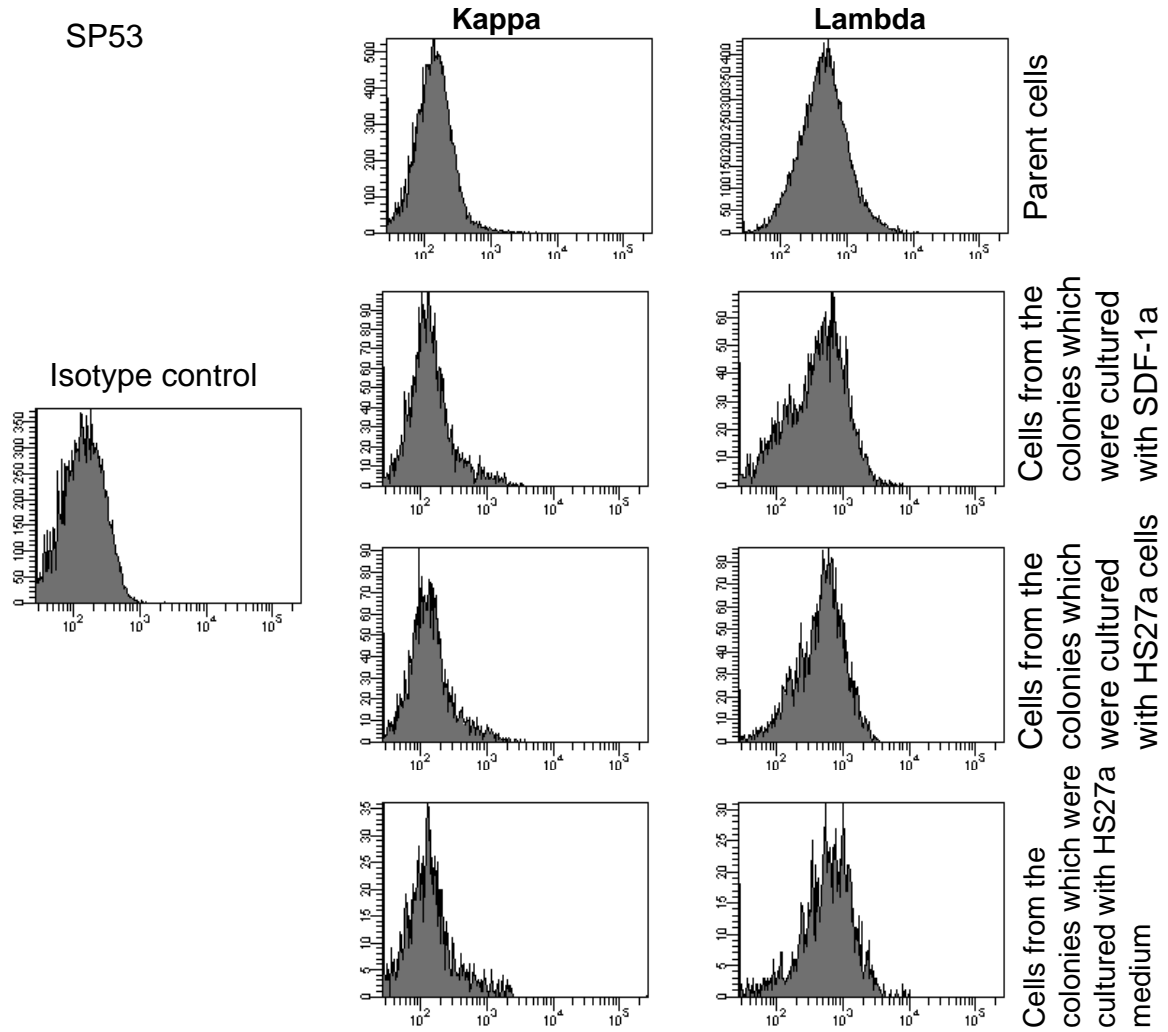

Figure S6.

**SP53**

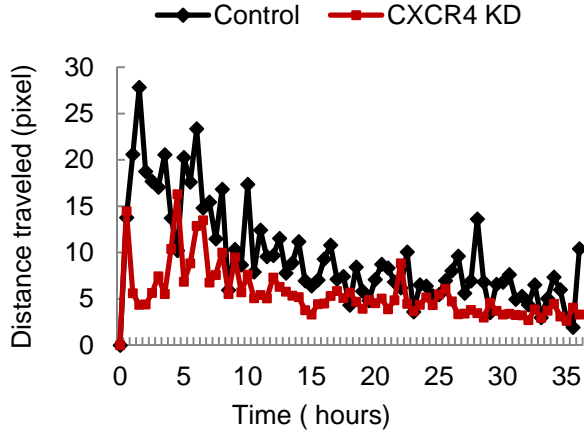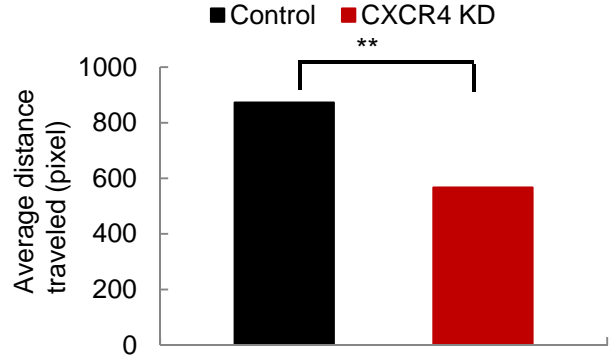

**REC1**

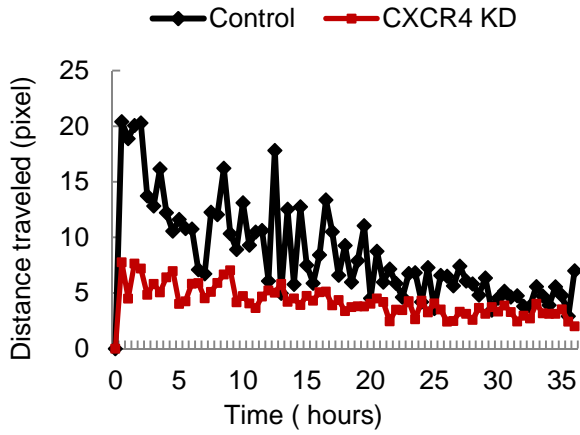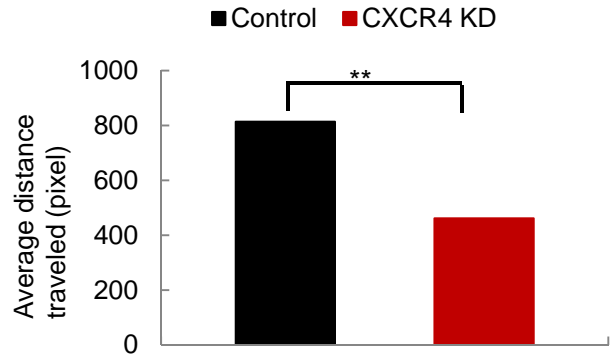

\*\* : P<0.05

Figure S7.

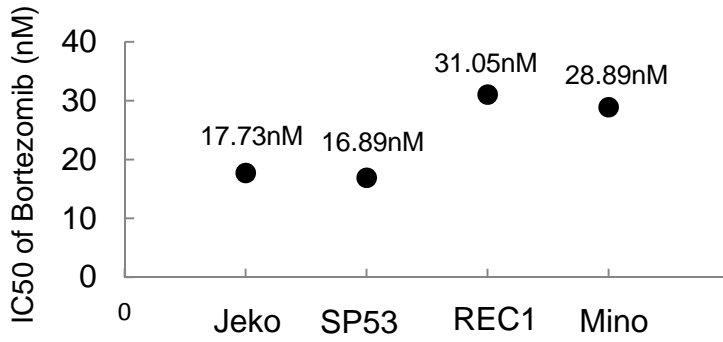

Figure S8.

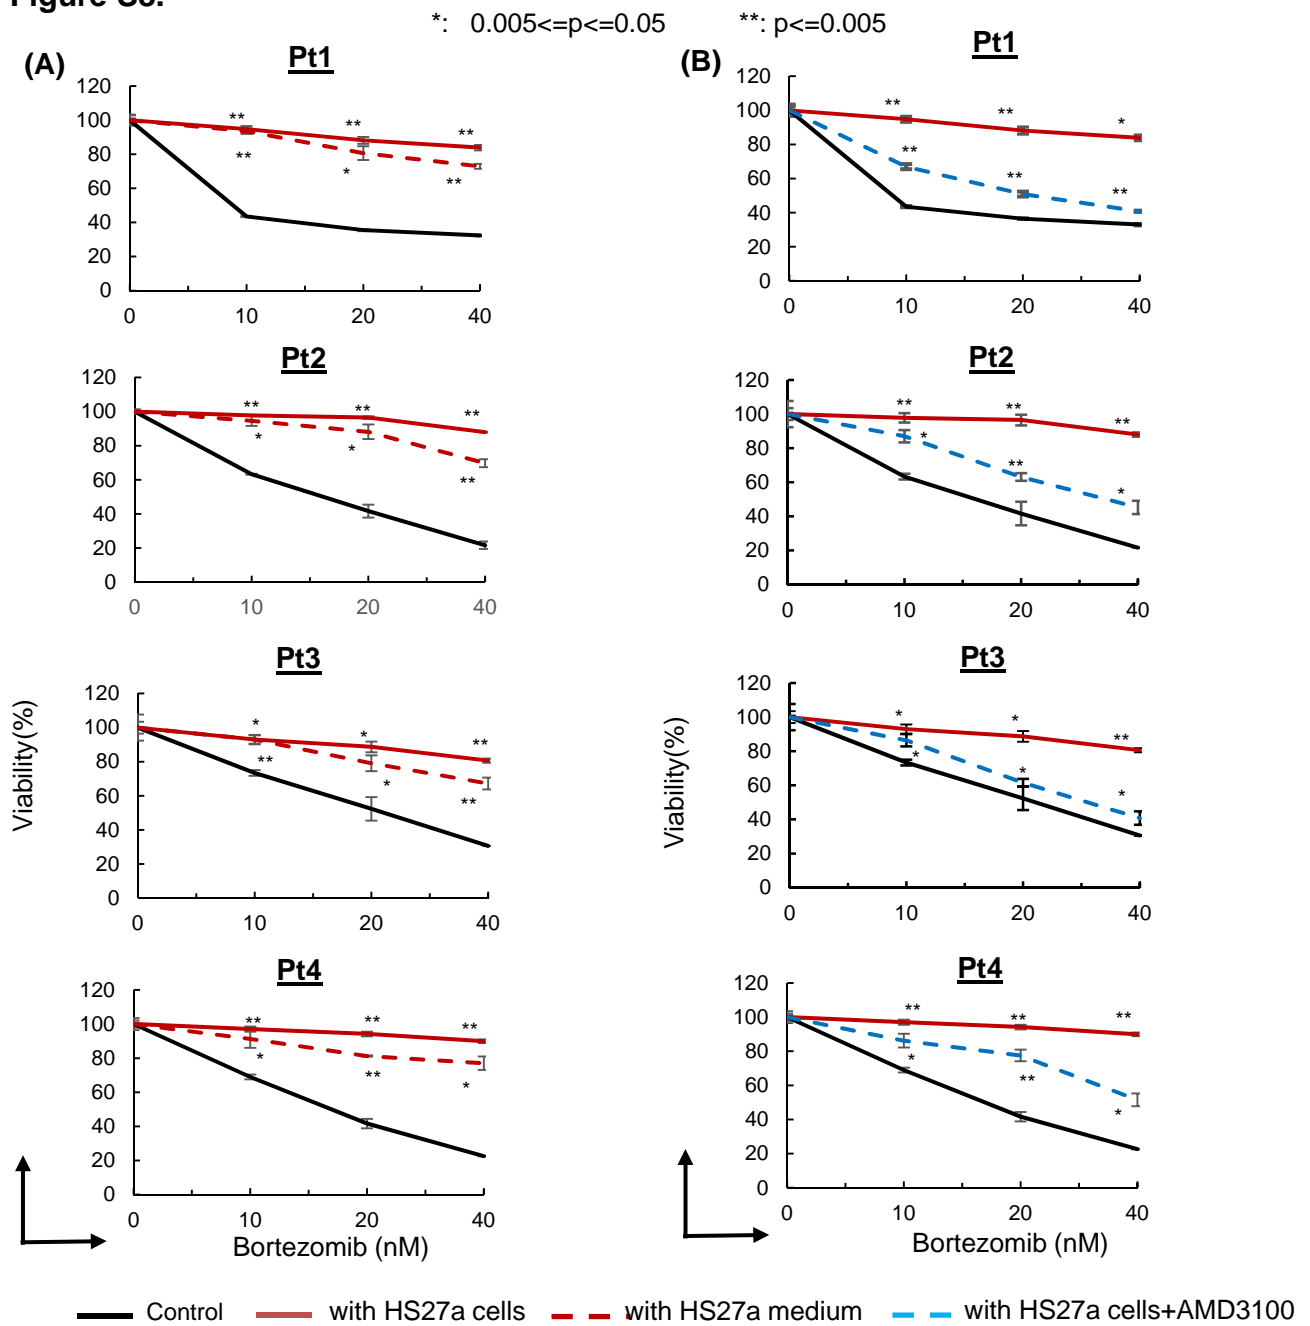

Figure S9.

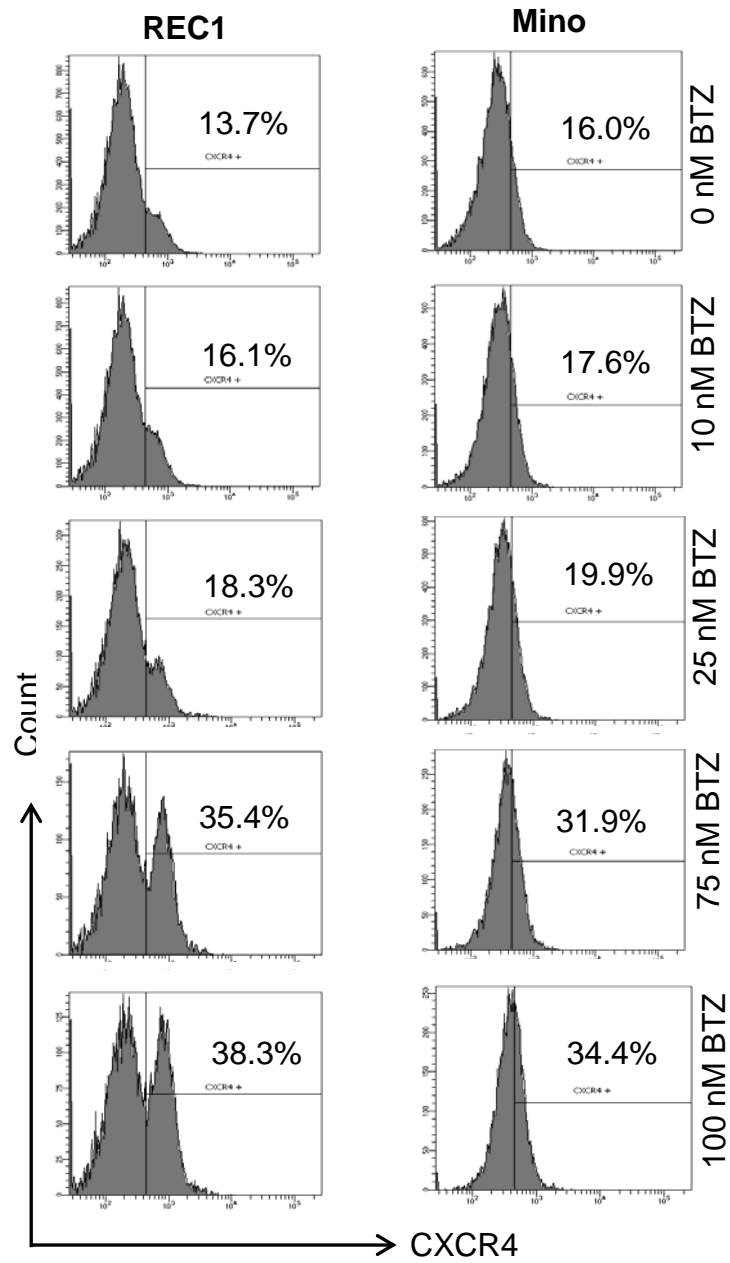



Figure S10.

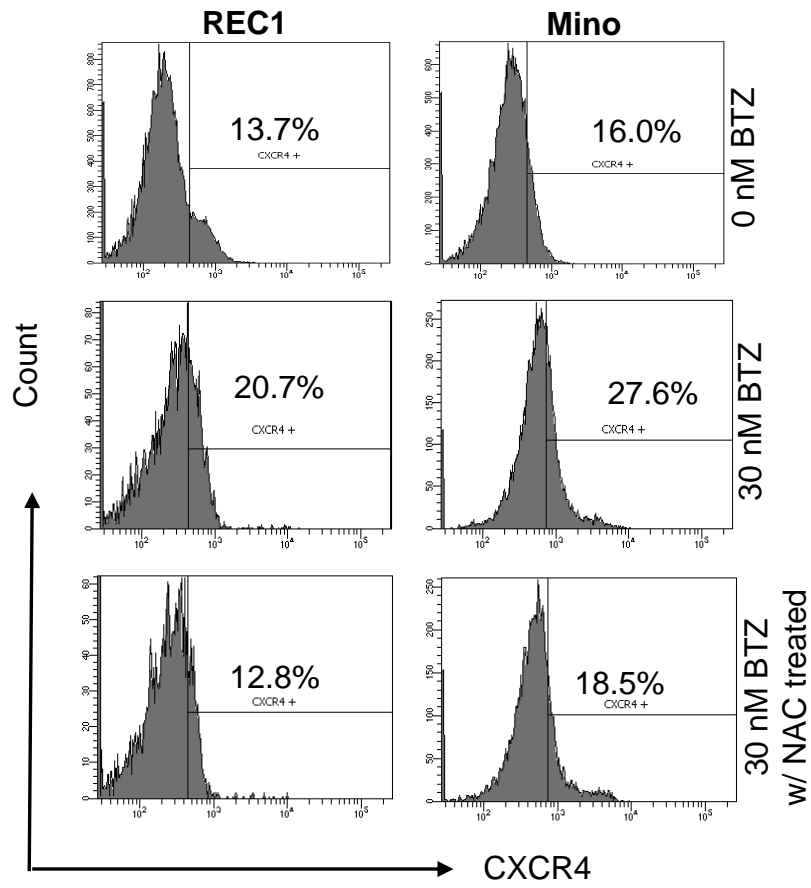

Figure S11.

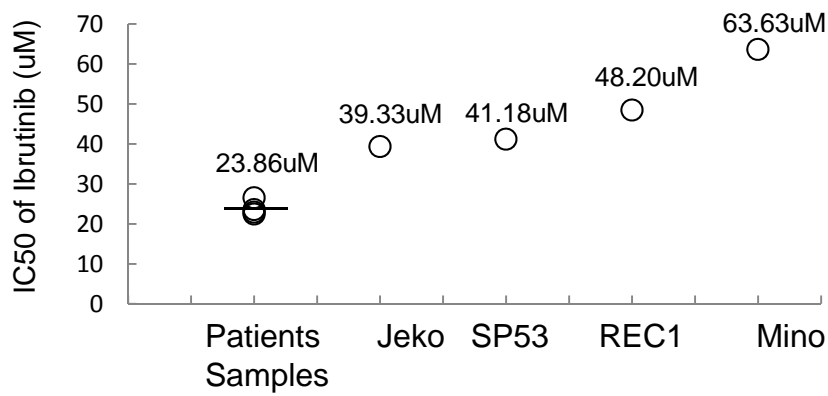

Figure S12.

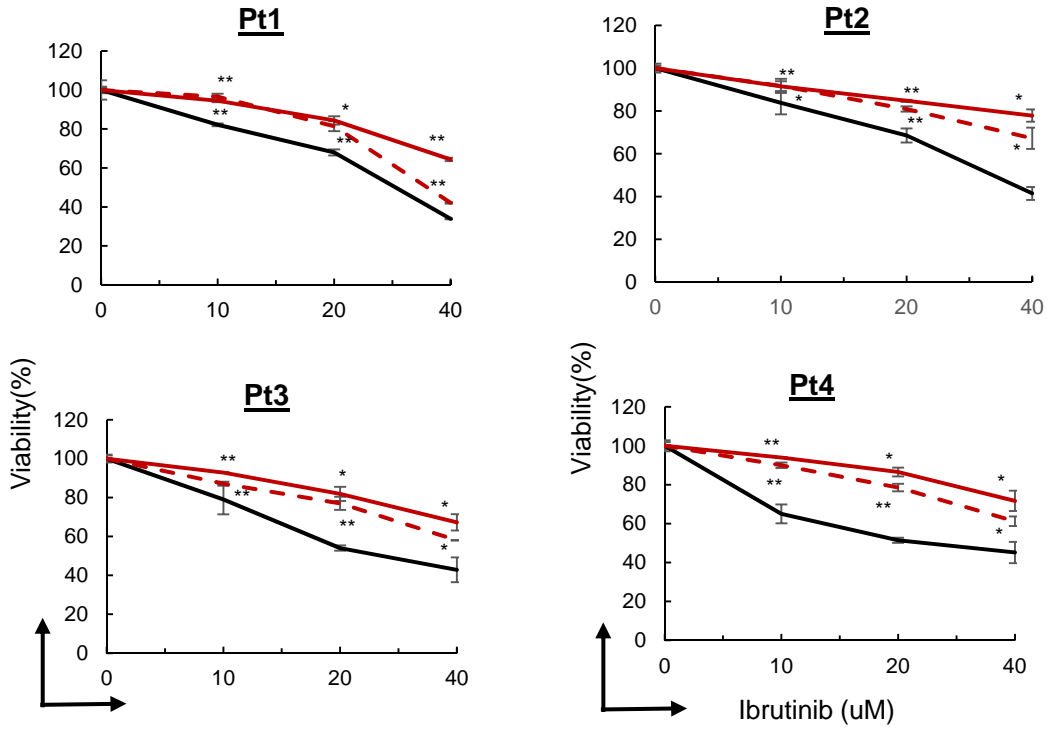

\*: 0.005 ≤ p ≤ 0.05      \*\*: p < 0.005

— Control    — with HS27a cells    - - - with HS27a medium

Figure S13.

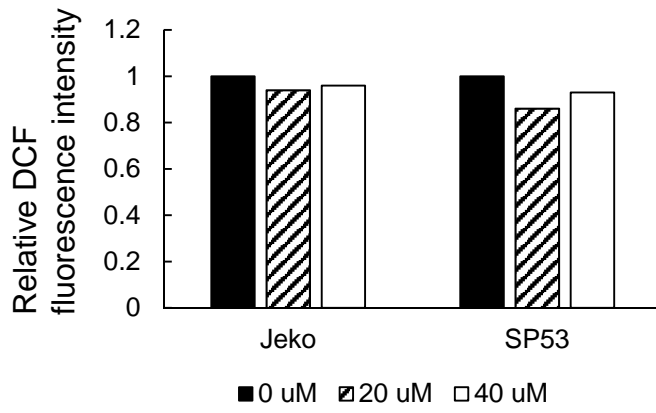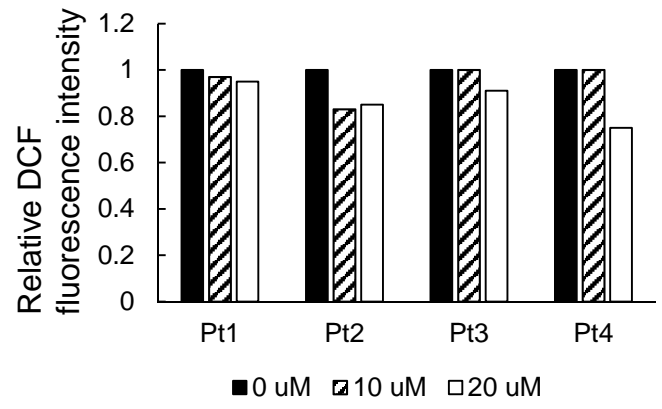

Figure S14.

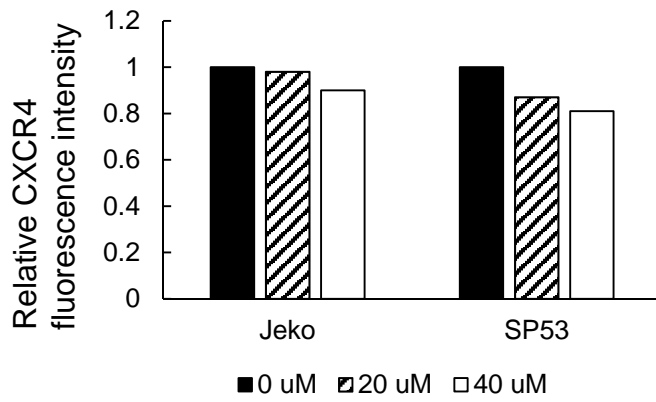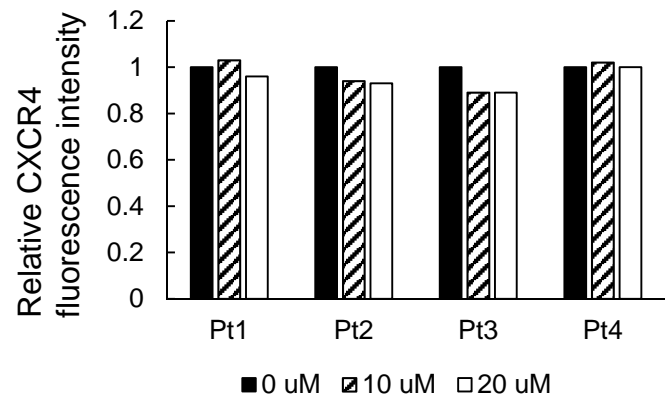

Figure S15.

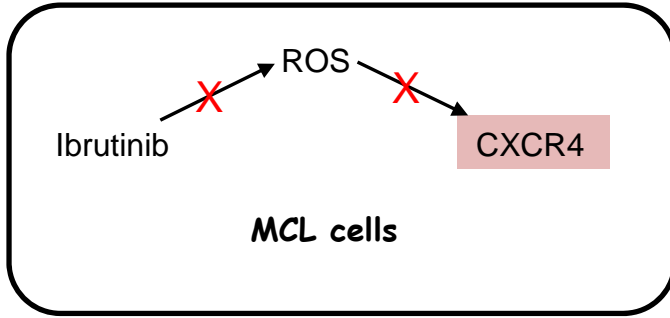

Figure S16.

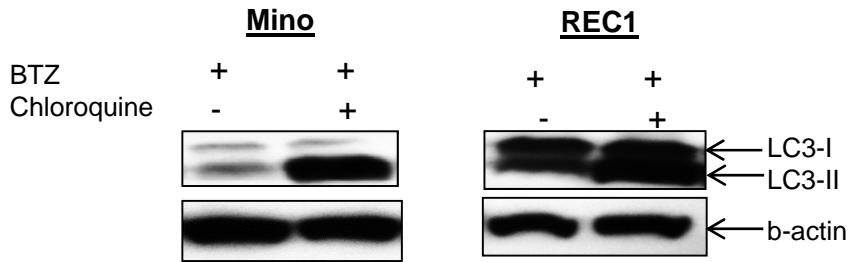

Figure S17.

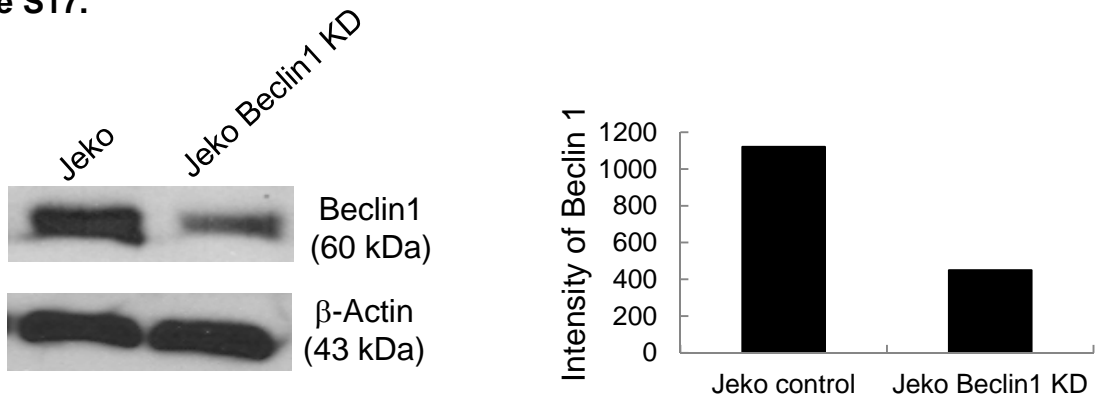

Figure S18.

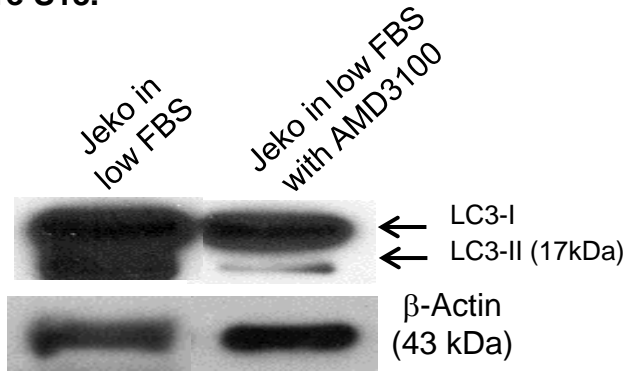

Figure S19.

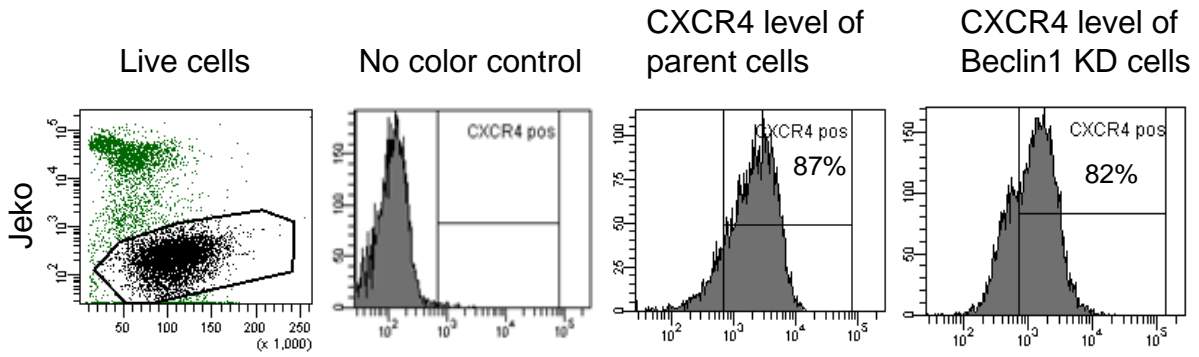

Supplement: NIHMS728194-supplement-2.pdf [file NIHMS728194-supplement-2.pdf]
