# Supplementary material
Source: PubMed Central journal article supplement (PMC4703439)
Supplement: NIHMS728194-supplement-1.pdf [file NIHMS728194-supplement-1.pdf]

### Supplemental Figures 1-19

**Figure S1:** FACS analyses of CXCR4 silenced in Jeko, SP53 and Z138 MCL cells. GFP-positive cells were sorted after infection and CXCR4 expression was evaluated using FACS analyses. 94-74% reduction was noted in all knock down cells.

**Figure S2:** Migration of MCL cells to SDF-1 was effectively decreased after CXCR4 silencing. GFP-positive controls or CXCR4 silenced MCL cells ( $10^5$ ) were placed in upper chambers with different concentrations of SDF-1 in lower chambers and the cells were counted in the lower chamber after 24 hours.

**Figure S3:** CXCR4 silenced cells showed reduction of migration toward the medium harvested from HS27a culture. Medium from HS27a was harvested after 3 days and  $600 \mu\text{L}$  was added to transwell. GFP-positive controls or CXCR4 silenced MCL cells (Jeko, SP53, Z138 and REC1,  $10^5$ ) were placed in upper chambers with HS27a medium in lower chambers and cells were counted in the lower chambers after 24 hours.

**Figure S4:** SDF-1 protects the MCL cells from starvation induced cell death but neutralized antibodies were reversed the effect of protection. MCL cells ( $1 \times 10^6$ ) were cultured in low serum for three days and SDF-1 (10ng/ml) or neutralizing SDF-1 antibodies were added to the culture. Cell death were evaluated based on 7-AAD/Annexin V staining using FACS.

**Figure S5:** Colonies from PHA-LCM medium was harvested and light chain restriction was analyzed using fix and perm cell permeabilization kit (Invitrogen). Colonies harvested from PHA-LCM medium were lambda restricted similar to the SP53 parent cells.

**Figure S6:** CXCR4 silencing decreases the motility of MCL cells. We quantitatively measured the distances the CXCR4-silenced or control cells travelled over 2 days using a time-lapse microscopy. Distances (mm) traveled by CXCR4-silenced SP53 and REC1 cells, which were an average of results from 15 different wells, were significantly decreased compared to the control cells.

**Figure S7:** Bortezomib IC<sub>50</sub> was calculated using different MCL cells. IC<sub>50</sub> value (the concentration of a drug that is required for 50% inhibition *in vitro*) was used to indicate the quantitative measure of the different cell killing effect of drugs. The Hill-Slope logistic model is used to calculate IC<sub>50</sub> using MS Excel.

**Figure S8A&B: (A)** HS27a stromal cells as well as HS27a media protect MCL cells from chemotherapeutic drug cytotoxicity. CD19<sup>+</sup> cells were isolated from four different patient cells ( $10^5$ ) and were cultured with HS27a stromal cells or 1 ml of 1:1 diluted HS27a medium. Cell viability was determined by the CellTiter-Blue® fluorometric assay (Promega) and was indicated as a ratio compared to cell viability without treatment. Bortezomib was serially diluted (0-40 nM) as indicated. The results represent the mean  $\pm$  standard deviation of triplicates. \*,  $P < 0.05$ ; \*\*,  $P < 0.005$ .  $P$  values were calculated using Student's  $t$ -test.

**(B)** AMD3100 treatment abolishes the protective effects of the stromal cells against chemotherapeutic drugs. A CXCR4 antagonist, AMD3100 (40 nM), was incubated with MCL cells for 24 hours, and cell viability was determined by CellTiter-Blue. The results represent the mean  $\pm$  standard deviation of triplicates. \*,  $P < 0.05$ , \*\*,  $P < 0.005$ ;  $P$  values were calculated using Student's  $t$ -test.

**Figure S9:** Bortezomib treatment induces CXCR4 expression in MCL cells. Bortezomib-resistant Mino and REC1 cells ( $10^6$ , 6-well plate) were treated with different doses of bortezomib (0-100 nM for 24 hours). CXCR4 expression was analyzed by FACS.

**Figure S10:** ROS generated after bortezomib treatment induces CXCR4 upregulation in MCL cells. Bortezomib-resistant Mino and REC1 cells ( $10^6$ , 6-well plate) were treated with bortezomib (30 nM for 24 hours) with or without NAC (100 mM, 1 hour). CXCR4 expression was evaluated using FACS.

**Figure S11:** Ibrutinib IC<sub>50</sub> was calculated using different MCL cells. IC<sub>50</sub> value (the concentration of a drug that is required for 50% inhibition *in vitro*) was used to indicate the quantitative measure of the different cell killing effect of drugs. The Hill-Slope logistic model is used to calculate IC<sub>50</sub> using MS Excel.

**Figure S12:** HS27a stromal cells as well as HS27a media protect MCL cells from Ibrutinib cytotoxicity. CD19<sup>+</sup> cells were isolated from four different patient cells ( $10^5$ ) and were cultured with HS27a stromal cells or 1 ml of 1:1 diluted HS27a medium. Cell viability was determined by the CellTiter-Blue® fluorometric assay (Promega) and was indicated as a ratio compared to cell viability without treatment. Ibrutinib was serially diluted (0-40 nM) as indicated. The results represent the mean  $\pm$  standard deviation of triplicates. \*,  $P < 0.05$ ; \*\*,  $P < 0.005$ .  $P$  values were calculated using Student's  $t$ -test.

**Figure S13:** ROS weren't generated after Ibrutinib treatment. Jeko and SP53 cells ( $10^6$ , 6-well plate) were treated with Ibrutinib (0, 20, 40  $\mu$ M for 24 hours) and ROS was measured using DCH-FDA (Sigma-Aldrich). ROS was measured at Ex/Em, 480/520 nm and then analyzed by flow cytometry.

**Figure S14:** Ibrutinib treatment did not induce CXCR4 upregulation in MCL cells. Jeko and SP53 cells ( $10^6$ , 6-well plate) were treated with Ibrutinib (0, 20 and 40  $\mu$ M) and CXCR4 expression was evaluated using FACS.

**Figure S15:** A model diagram depicting observations made in the study. Ibrutinib treatment does not produce ROS as well as does not induce upregulation of CXCR4.

**Figure S16:** Bortezomib (30 nM) was added to the MCL cells with or without lysosomal inhibitor chloroquine (50  $\mu$ M), and autophagy induction was analyzed based on the LC3B-I to LC3B-II conversion as measured by immunoblots.

**Figure S17:** Beclin1 was knocked down using lentivirus mediated shRNA in Jeko cells and Beclin1 levels were evaluated using immunoblots. GFP+ cells were selected followed by antibiotic selection to ensure knock down. Densitometer analysis showed a significant down-regulation of beclin 1 in GFP+ Jeko cells compared to GFP+ scrambled shRNA infected Jeko cells.

**Figure S18:** Jeko cells were cultured in low serum condition with AMD3100 to inhibit CXCR4 expression and autophagy expression was analyzed using immunoblots based on LC3-I to LC3-II conversion.

**Figure S19:** Beclin 1 silencing does not change CXCR4 expression in MCL cells.
