# Supplementary material
Source: PubMed Central journal article supplement (PMC4703439)
Supplement: NIHMS728194-supplement-3.pdf [file NIHMS728194-supplement-3.pdf]

**Supplemental Tables 1-4**

**Table S1.** Jeko, SP53 and Z138 MCL cells ( $5 \times 10^3$ ) were cultured in PHA-LCM methylcellulose medium, and the numbers of colonies were counted a week later. SDF-1 (200 ng/ml) or AMD3100 (40 mM) or AMD3100 with SDF-1 were added during culture.

**Table S2.** MCL cells ( $5 \times 10^3$ ) were cultured in PHA-LCM medium with human bone marrow stromal cells, HS27a, or SDF-1 neutralizing antibodies (100 mg/ml). In some experiments, MCL cells were also cultured using stromal cells for 24 hours and collected for the colony forming assays.

**Table S3.** Decreased quiescent PKH-positive cell recovery in vivo upon CXCR4 silencing. GFP-positive CXCR4 shRNA MCL or control shRNA cells ( $5 \times 10^5$ ) were labeled using the fluorescent dye PKH26 and injected into NOD/SCID mice to evaluate engraftment. Mice were sacrificed after 48 hours, and the cells were isolated from the osteoblastic and vascular niches of the bone marrow and spleens.

**Table S4.** Decreased quiescent PKH-positive cell recovery in vivo upon Beclin1 silencing. GFP-positive Beclin1 shRNA MCL or control shRNA cells were labeled using the fluorescent dye PKH26 and injected into NOD/SCID mice to evaluate engraftment. Mice were sacrificed after 48 hours, and the cells were isolated from the osteoblastic niche and vascular niches of the bone marrow and spleens.
