# Supplementary material
Source: PubMed Central journal article supplement (PMC4703439)
Supplement: NIHMS728194-supplement-4.pdf [file NIHMS728194-supplement-4.pdf]

**Table S1.**

| Cell Type | Cell Treatment    | # of colony found |
|-----------|-------------------|-------------------|
| Jeko      | Control           | 51 (30/15/6)      |
|           | SDF-1 only        | 116 (38/52/26)    |
|           | AMD3100 and SDF-1 | 71 (37/12/22)     |
| SP53      | Control           | 21(14/5/2)        |
|           | SDF-1 only        | 54 (14/19/21)     |
|           | AMD3100 and SDF-1 | 45 (9/15/21)      |
| Z138      | Control           | 105 (34/48/23)    |
|           | SDF-1 only        | 148 (54/63/31)    |
|           | AMD3100 and SDF-1 | 109 (47/29/33)    |

**Table S2.**

| Cell type | Cell treatment                       | # of colony found |
|-----------|--------------------------------------|-------------------|
| Jeko      | Control                              | 51 (30/15/6)      |
|           | on HS27a cells                       | 400 (171/157/72)  |
|           | Cultured with HS27a prior to PHA-LCM | 200 (61/87/52)    |
|           | SDF-1 neutralizing antibodies        | 81 (36/16/29)     |
| SP53      | Control                              | 21(14/5/2)        |
|           | on HS27a cells                       | 412 (91/175/146)  |
|           | Cultured with HS27a prior to PHA-LCM | 529 (141/181/207) |
|           | SDF-1 neutralizing antibodies        | 67 (26/13/28)     |
| Z138      | Control                              | 105 (34/48/23)    |
|           | on HS27a cells                       | 242 (101/77/64)   |
|           | Cultured with HS27a prior to PHA-LCM | 188 (51/69/68)    |
|           | SDF-1 neutralizing antibodies        | 85 (18/31/36)     |

**Table S3.****Jeko CXCR4 KD**

| Source of PKH26+ Cells                               | # of mouse | Tissue Examined | % PKH26+ Cells Recovered |
|------------------------------------------------------|------------|-----------------|--------------------------|
| PKH+ injected into mouse and sacrificed after 48 hr. | 1          | OS/VS/SP        | 2.56/2.80/11.6           |
|                                                      | 1          |                 | 2.00/3.17/10.9           |
|                                                      | 1          |                 | 1.53/3.25/16.4           |
|                                                      | 1          |                 | 1.71/3.06/14.4           |
|                                                      | 1          |                 | 3.90/3.61/7.58           |
|                                                      | 1          |                 | 3.67/2.81/13.5           |
|                                                      | 1          |                 | 4.10/3.95/12.4           |
|                                                      | 1          |                 | 3.17/1.78/10.1           |
| 8 total                                              |            |                 | 2.83/3.05/12.1           |

**Jeko Control**

| Source of PKH26+ Cells                               | # of mouse | Tissue Examined | % PKH26+ Cells Recovered |
|------------------------------------------------------|------------|-----------------|--------------------------|
| PKH+ injected into mouse and sacrificed after 48 hr. | 1          | OS/VS/SP        | 5.10/6.02/16.2           |
|                                                      | 1          |                 | 6.00/5.95/21.6           |
|                                                      | 1          |                 | 6.31/4.66/21.9           |
|                                                      | 1          |                 | 5.47/5.64/17.1           |
|                                                      | 1          |                 | 4.96/4.68/12.0           |
|                                                      | 1          |                 | 5.62/6.05/11.8           |
|                                                      | 1          |                 | 9.92/11.8/15.0           |
|                                                      | 1          |                 | 6.40/8.06/16.7           |
|                                                      | 1          |                 | 6.85/9.82/16.0           |
| 9 total                                              |            |                 | 6.29/6.96/16.5           |

**PKH+ cell engraftment reduction %: 55%/56%/26%**

**Table S4.****Jeko Control**

| Source of PKH26+ Cells                               | # of mouse | Tissue Examined | % PKH26+ Cells Recovered |
|------------------------------------------------------|------------|-----------------|--------------------------|
| PKH+ injected into mouse and sacrificed after 48 hr. | 1          | OS/VS/SP        | 5.10/6.02/16.2           |
|                                                      | 1          |                 | 6.00/5.95/21.6           |
|                                                      | 1          |                 | 6.31/4.66/21.9           |
|                                                      | 1          |                 | 5.47/5.64/17.1           |
|                                                      | 1          |                 | 4.96/4.68/12.0           |
|                                                      | 1          |                 | 5.62/6.05/11.8           |
|                                                      | 1          |                 | 9.92/11.8/15.0           |
|                                                      | 1          |                 | 6.40/8.06/16.7           |
|                                                      | 1          |                 | 6.85/9.82/16.0           |
|                                                      | Ave.       |                 | 6.29/6.96/16.5           |

**Jeko Beclin1 KD**

|                                                      |      |          |                |
|------------------------------------------------------|------|----------|----------------|
| PKH+ injected into mouse and sacrificed after 48 hr. | 1    | OS/VS/SP | 2.62/3.48/8.24 |
|                                                      | 1    |          | 2.85/3.13/14.0 |
|                                                      | 1    |          | 3.36/3.31/7.04 |
|                                                      | Ave. |          | 2.94/3.31/9.76 |

**SP53 Control**

|                                                      |      |          |                |
|------------------------------------------------------|------|----------|----------------|
| PKH+ injected into mouse and sacrificed after 48 hr. | 1    | OS/VS/SP | 5.41/5.76/12.3 |
|                                                      | 1    |          | 5.01/4.86/11.8 |
|                                                      | 1    |          | 6.09/5.21/12.1 |
|                                                      | Ave. |          | 5.50/5.28/12.1 |

**SP53 Beclin1 KD**

|                                                      |      |          |                |
|------------------------------------------------------|------|----------|----------------|
| PKH+ injected into mouse and sacrificed after 48 hr. | 1    | OS/VS/SP | 2.30/2.00/5.53 |
|                                                      | 1    |          | 1.67/1.90/5.09 |
|                                                      | 1    |          | 1.91/1.74/6.54 |
|                                                      | Ave. |          | 1.96/1.88/5.72 |
